# Supplementary material for: Pathway-specific responses of isoprene-derived secondary organic aerosol formation to anthropogenic emission reductions in a megacity in eastern China
Source: Copernicus journal article supplement (doi:10.5194/egusphere-2025-1909), 2025-05-15
Supplement: Supplementary file 1 [file egusphere-2025-1909-supplement.pdf]

1 *Supplement of*  
2 **Pathway-specific responses of isoprene-derived secondary organic**  
3 **aerosol formation to anthropogenic emission reductions in a megacity**  
4 **in eastern China**

5 **Huilin Hu, et al.**

6

7 Correspondence: Yue Zhao (yuezhao20@sjtu.edu.cn); Jingyi Li (Jingyili@nuist.edu.cn)

8

## **S1. Sample preparation and analysis of iSOA polyol tracers**

For the analysis of iSOA polyols, the samples were prepared with following procedures. An aliquot of quartz filter of  $\sim 17.35 \text{ cm}^2$  were cut from each sample and then ultrasonically extracted three times with 15 mL of dichloromethane: methanol (2:1, v/v, GC grade and LC-MS grade, respectively, CNW Technologies GmbH) for 15 min each time. Prior to extraction, 200  $\mu\text{L}$  ketopinic acid (2 ppm) was spiked onto the filter as an internal standard. The extracts derived each time were filtered with a PTFE hydrophobic syringe filter (0.45  $\mu\text{m}$  pore size, Millipore), combined, and then concentrated to 500  $\mu\text{L}$  by a rotary evaporator (RE52A, Shanghai Yarong Biochemical Instrument), which was then blown to dryness under a gentle nitrogen stream (99.99%, Shanghai Keju Chemical Co., LTD) and reconstituted in 420  $\mu\text{L}$  of dichloromethane: methanol (2:1, v/v). Subsequently, 120  $\mu\text{L}$  of the solution were taken and blown to dryness under  $\text{N}_2$ , followed by derivatization with 150  $\mu\text{L}$  of N, O-bis-(trimethylsilyl) trifluoroacetamide (BSTFA)/pyridine (2/1, v/v, Sigma-Aldrich) in an oven at 85  $^\circ\text{C}$  for 2 h.

iSOA polyol tracers were analyzed by a GC-MS, the details of (QP2020, Shimadzu) equipped with SH-5MS column (30 m  $\times$  0.25 mm I.D., 0.25  $\mu\text{m}$  film thickness, J&W Scientific). The GC-MS was operated in the electron ionization (EI) mode and the trimethylsilyl derivatives were analyzed under selected ion monitoring (SIM) mode. The GC oven was initially held at 80 $^\circ\text{C}$  for 5 min, heated at 3 $^\circ\text{C min}^{-1}$  to 200 $^\circ\text{C}$ , held for 2 min, then increased to 300 $^\circ\text{C}$  at 15 $^\circ\text{C min}^{-1}$ , and held at 300 $^\circ\text{C}$  for 15 min. Temperatures of the injector, the ion trap, and the interface were set to 275 $^\circ\text{C}$ , 200 $^\circ\text{C}$ , and 300 $^\circ\text{C}$ , respectively.

## **S2. Sample preparation and analysis of iSOA OS tracers**

An aliquot of quartz filter ( $\sim 17.35 \text{ cm}^2$ ) was taken from each sample, followed by 30 min of ultrasonic extraction in 3 mL of methanol (LC-MS grade, CNW Technologies GmbH) for two times. The extracts were filtered and concentrated to 250  $\mu\text{L}$  under a gentle nitrogen stream, which were subsequently mixed with ultrapure water of the same volume and centrifuged under 4  $^\circ\text{C}$ .

The supernatants obtained by centrifugation were analyzed using an ultra-performance liquid chromatography quadrupole time-of-flight mass spectrometer equipped with an electrospray ionization (ESI) source (UPLC-ESI-QToFMS) (Xevo G2-XS QToFMS, Waters), which was operated in the full scan and negative ion modes. An ethylene-bridged hybrid  $\text{C}_{18}$  column (2.1 mm  $\times$  100 mm, 1.7  $\mu\text{m}$  particle size, Waters) was employed to separate the analytes. The eluents consisting of water with 0.1% acetic acid (eluent A) and methanol (eluent B) were injected at a flow rate of 0.33 mL  $\text{min}^{-1}$ , following a gradient elution program: 99% A held for the initial 1.5 min; decreased to 46% over 6.5 min and to 5% over 3 min; then decreased to 1% over 1 min, held for 2 min; and finally returned to 99% over 0.5 min, held for 1.5 min to balance

the pump pressure and column. The detailed ESI conditions were described in our previous studies (Wang et al., 2021; Yang et al., 2023). Data were processed by MassLynx v4.2.

### S3. Gas-phase fraction estimation of iSOA tracers

Previous studies have illustrated that iSOA polyol tracers are semi-volatile and water-soluble, which can partition into OM or dissolve into aerosol liquid water, while OS tracers are considered non-volatile (Yee et al., 2020; Nguyen et al., 2015). Herein, optimized chemical equilibrium partitioning model were used to estimate the gas-organic phase and gas-aqueous phase partitioning of iSOA polyol tracers (Wania et al., 2015).

The gas-particle partitioning equilibrium can be described by the absorptive gas/organic matter partitioning coefficient ( $K_{p,i}$ ,  $\text{m}^3 \text{g}^{-1}$ ),

$$K_{p,i} = \frac{c_{p,i}}{c_{g,i} C_{OA}} \quad (1)$$

Where  $c_{p,i}$  is the tracer concentration in the organic aerosol phase ( $\mu\text{g m}^{-3}$ ),  $c_{g,i}$  is the tracer concentration in the gas phase ( $\mu\text{g m}^{-3}$ ), and  $C_{OA}$  is the concentration of organic matter ( $\mu\text{g m}^{-3}$ ). The  $K_{p,i}$  can be calculated from the saturation mass concentration ( $C_i^*$ ,  $\mu\text{g m}^{-3}$ ) of the tracer via eq 2 (Pankow and James, 1994).

$$K_{p,i} = \frac{1}{\delta_i C_i^*} = \frac{RT}{10^6 \delta_i M_i p_{L,i}^o} \quad (2)$$

Where  $\delta_i$  is the activity coefficient of the compound  $i$  in the particle phase taking a value of 1 in this study,  $M_i$  is its molecular weight ( $\text{g mol}^{-1}$ ),  $p_{L,i}^o$  is the saturation vapor pressure (atm) that was estimated using EVAPORATION model (O'meara et al., 2014),  $R$  is the ideal gas constant of  $8.21 \times 10^{-5} \text{ m}^3 \text{ atm mol}^{-1} \text{ K}^{-1}$ , and  $T$  is the temperature in Kelvin.

The gas-aqueous phase partitioning equilibrium is described by Henry's Law. The gas-aqueous phase distribution ( $f_H$ ) was calculated by eq 3:

$$f_H = \frac{C_{aq}}{C_{gas}} = 10^{-6} \cdot H^* \cdot R \cdot T \cdot LWC_{total} \quad (3)$$

Where the  $C_{aq}$  and  $C_{gas}$  are the aqueous-phase and gas-phase concentrations of the tracers ( $\mu\text{g m}^{-3}$ ), respectively;  $H^*$  is the effective Henry's law constant ( $\text{M atm}^{-1}$ ), estimated based on the Henry's law constants of 2-MTs ( $3.38 \times 10^{10} \text{ M atm}^{-1}$ ) and 2-MG ( $5.25 \times 10^8 \text{ M atm}^{-1}$ ) in water at 298 K (Zhang et al., 2023), with the aerosol acidity effect for 2-MG and the temperature dependence for both 2-MTs and 2-MG being taken into account (The detailed formula and parameters have been described in (Zhang et al., 2023);  $LWC_{total}$  ( $\mu\text{g m}^{-3} \text{ air}$ ) is the sum of LWC associated with inorganic aerosol ( $LWC_{inorg}$ , calculated by ISORROPIA-II) and hygroscopic OA ( $LWC_{org}$ ) (Wania et al., 2015; Zhang et al., 2023). The  $LWC_{org}$  was estimated

by eq 4 (Wania et al., 2015), The  $LWC_{org}$  was estimated to be lower than  $1 \mu g m^{-3}$ , while  $LWC_{inorg}$  are ranging from 1- 50  $\mu g m^{-3}$ .

$$LWC_{org} = \rho_w V_{org} \kappa_{org} \frac{1-a_w}{a_w} \quad (4)$$

Where  $\rho_w$  is the density of water,  $V_{org}$  is the volume of OA (calculated by the mass concentration of OM divided by its density assuming to be  $1.2 g cm^{-3}$ ),  $a_w$  is the water activity, assuming the same value as RH,  $\kappa_{org}$  represents the hygroscopicity parameter for the organic mixture, estimated by oxygen to carbon ratio (O:C) of organic aerosol via eq 5 (Pye et al., 2017; Rasool et al., 2021).

$$\kappa_{org} = 0.14 \times O:C + 0.03 \quad (5)$$

In this study, the average O:C value ( $\sim 0.35$ ) observed for OA in Shanghai (He et al., 2020; Huang et al., 2013; Liu et al., 2018) was used for the calculation.

The fraction in each phase can be calculated by eqs 6-8:

$$F_{gas} = \frac{1}{1 + C_{om}/C^* + f_H} \quad (6)$$

$$F_{org} = \frac{C_{om}/C^*}{1 + C_{om}/C^* + f_H} \quad (7)$$

$$F_{aq} = \frac{f_H}{1 + C_{om}/C^* + f_H} \quad (8)$$

The particulate fraction of 2-MTs and 2-MG are defined as the summed fraction in organic and aqueous phases ( $F_p = F_{org} + F_{aq}$ ).

#### S4. Estimation of the wet particle diameter

According to  $\kappa$ -Köhler theory, the wet diameter of particle matter ( $D_{RH}$ ) is relative humidity-dependent (Brock et al., 2016), calculated by eq 9 :

$$\frac{RH}{100} = \frac{D_{RH}^3 - D_d^3}{D_{RH}^3 - D_d^3(1-k)} \exp\left(\frac{4\sigma_s M_w}{RT\rho_w D_{RH}}\right) \quad (9)$$

where  $D_d$  is the dry particle diameter;  $\sigma_s$  is surface tension of the particles;  $\rho_w$  and  $M_w$  are the density and molecular weight of water; R is the ideal gas constant; and T is the temperature (in K).  $k$  is calculated as (Petters and Kreidenweis, 2007),

$$k = 0.01 + 0.63f_{NH_4} + 0.51f_{NO_3} + 0.81f_{SO_4} + 0.18f_{WSOC}$$

Where  $f_x$  is the mass proportion of inorganic ion x in  $PM_{2.5}$ . The contribution of water-soluble organic compounds (WSOC) is not considered as the  $f_{WSOC}$  is small during the sampling campaign.

**Table S1.** Concentrations of identified isoprene-derived SOA compound classes, PM<sub>2.5</sub> and its components, trace gases, aerosol liquid water content (LWC) and acidity (pH), as well as meteorological parameters in urban Shanghai

|                                                     | Summer- 15 |        | Winter-15 |       | Summer-19 |        | Winter-19 |       | Summer-21 |       | Winter-21 |       | 2015  |        | 2019  |        | 2021  |       |
|-----------------------------------------------------|------------|--------|-----------|-------|-----------|--------|-----------|-------|-----------|-------|-----------|-------|-------|--------|-------|--------|-------|-------|
|                                                     | n=23       |        | n=20      |       | n=23      |        | n=20      |       | n=24      |       | n=28      |       |       |        |       |        |       |       |
|                                                     | mean       | STD    | mean      | STD   | mean      | STD    | mean      | STD   | mean      | STD   | mean      | STD   | mean  | STD    | mean  | STD    | mean  | STD   |
| 2-MG-OS (ng m <sup>-3</sup> )                       | 4.57       | 5.18   | 1.26      | 0.56  | 4.49      | 5.89   | 1.16      | 0.54  | 5.46      | 5.91  | 1.14      | 0.43  | 3.04  | 4.13   | 2.94  | 4.59   | 3.21  | 4.61  |
| 2-MT-OS (ng m <sup>-3</sup> )                       | 35.80      | 48.97  | 0.46      | 0.19  | 29.20     | 49.50  | 0.37      | 0.18  | 14.34     | 20.99 | 0.28      | 0.16  | 19.42 | 39.71  | 15.79 | 38.67  | 7.02  | 16.02 |
| 2-MTs (ng m <sup>-3</sup> )                         | 12.27      | 11.80  | 0.51      | 0.34  | 18.95     | 25.27  | 0.42      | 0.28  | 14.95     | 20.04 | 0.40      | 0.39  | 6.98  | 10.50  | 10.82 | 20.93  | 7.23  | 15.43 |
| C <sub>5</sub> -alkene triols (ng m <sup>-3</sup> ) | 49.42      | 63.18  | 0.87      | 0.69  | 36.91     | 60.91  | 0.48      | 0.25  | 22.45     | 42.56 | 0.28      | 0.25  | 27.57 | 52.42  | 20.91 | 48.74  | 10.69 | 30.91 |
| 2-MG (ng m <sup>-3</sup> )                          | 2.02       | 1.85   | 1.02      | 0.48  | 2.35      | 2.22   | 0.74      | 0.41  | 2.21      | 1.93  | 0.30      | 0.28  | 1.57  | 1.48   | 1.65  | 1.85   | 1.20  | 1.63  |
| iSOA (ng m <sup>-3</sup> )                          | 100.26     | 123.12 | 3.78      | 2.11  | 88.70     | 135.43 | 2.9       | 1.07  | 59.40     | 90.08 | 2.42      | 1.07  | 55.55 | 101.65 | 51.03 | 109.30 | 29.72 | 68.02 |
| Cl <sup>-</sup> (μg m <sup>-3</sup> )               | 0.07       | 0.15   | 1.51      | 1.00  | 0.33      | 0.22   | 1.03      | 0.58  | 0.17      | 0.12  | 1.29      | 0.77  | 0.73  | 1.00   | 0.66  | 0.55   | 0.77  | 0.79  |
| NO <sub>3</sub> <sup>-</sup> (μg m <sup>-3</sup> )  | 0.96       | 1.10   | 16.56     | 10.05 | 3.41      | 3.18   | 14.06     | 9.96  | 1.64      | 0.98  | 16.83     | 9.67  | 8.19  | 10.40  | 8.36  | 8.89   | 9.70  | 10.39 |
| SO <sub>4</sub> <sup>2-</sup> (μg m <sup>-3</sup> ) | 7.42       | 3.06   | 11.14     | 5.13  | 4.15      | 2.00   | 9.23      | 5.3   | 3.29      | 1.80  | 5.39      | 3.11  | 9.14  | 4.51   | 6.52  | 4.62   | 4.40  | 2.76  |
| NH <sub>4</sub> <sup>+</sup> (μg m <sup>-3</sup> )  | 2.69       | 1.70   | 10.15     | 5.10  | 1.40      | 1.11   | 6.21      | 4.07  | 0.99      | 0.87  | 6.00      | 3.34  | 6.15  | 5.24   | 3.63  | 3.74   | 3.65  | 3.54  |
| OM (μg m <sup>-3</sup> )                            | 7.38       | 11.90  | 16.21     | 11.63 | 6.19      | 7.48   | 11.06     | 9.78  | 4.38      | 2.89  | 9.32      | 9.32  | 11.47 | 8.45   | 8.46  | 5.75   | 7.00  | 5.20  |
| EC (μg m <sup>-3</sup> )                            | 2.48       | 3.18   | 3.95      | 2.75  | 1.48      | 1.64   | 2.2       | 2.02  | 0.94      | 0.62  | 1.99      | 1.99  | 3.16  | 1.64   | 1.82  | 0.95   | 1.50  | 0.94  |
| PM <sub>2.5</sub> (μg m <sup>-3</sup> )             | 30.82      | 13.54  | 91.05     | 47.51 | 21.98     | 11.07  | 55.89     | 29.89 | 18.55     | 8.87  | 48.24     | 27.36 | 58.73 | 45.13  | 37.75 | 27.59  | 34.27 | 25.48 |
| LWC (μg m <sup>-3</sup> )                           | 9.57       | 4.50   | 31.69     | 16.83 | 5.01      | 3.32   | 29.16     | 19.78 | 4.26      | 2.51  | 14.96     | 12.39 | 19.82 | 16.21  | 16.24 | 18.20  | 9.94  | 10.58 |
| pH                                                  | 3.00       | 0.33   | 3.45      | 0.16  | 2.39      | 0.34   | 3.59      | 0.32  | 1.97      | 0.91  | 2.98      | 0.65  | 3.17  | 0.35   | 2.99  | 0.69   | 2.52  | 0.92  |
| NO <sub>2</sub> (ppb)                               | 17.75      | 6.38   | 36.27     | 13.66 | 13.40     | 4.55   | 35.65     | 10.14 | 9.40      | 4.49  | 33.39     | 12.99 | 25.85 | 13.75  | 24.02 | 13.55  | 22.35 | 15.60 |
| MDA8 O <sub>3</sub> (ppb)                           | 70.16      | 36.40  | 34.59     | 7.59  | 53.45     | 23.82  | 27.08     | 9.49  | 52.89     | 23.81 | 33.87     | 11.42 | 51.96 | 38.90  | 45.74 | 24.91  | 47.28 | 22.71 |
| O <sub>3</sub> (ppb)                                | 64.55      | 24.71  | 57.02     | 8.97  | 46.78     | 16.83  | 52.31     | 9.00  | 46.45     | 17.45 | 58.23     | 7.94  | 61.26 | 19.81  | 49.42 | 13.94  | 52.81 | 14.44 |
| T (°C)                                              | 30.20      | 2.29   | 7.22      | 3.12  | 30.54     | 2.27   | 6.24      | 1.72  | 29.83     | 1.31  | 6.74      | 2.97  | 19.55 | 11.91  | 19.24 | 12.43  | 17.60 | 11.87 |
| RH                                                  | 0.71       | 0.09   | 0.70      | 0.10  | 0.72      | 0.07   | 0.72      | 0.14  | 78.46     | 6.75  | 60.93     | 12.82 | 0.71  | 0.09   | 0.72  | 0.11   | 69.18 | 13.58 |

|                                           |       |       |      |      |       |       |       |       |       |       |       |       |      |      |       |       |       |       |
|-------------------------------------------|-------|-------|------|------|-------|-------|-------|-------|-------|-------|-------|-------|------|------|-------|-------|-------|-------|
| isoprene (ppb)                            | 0.194 | 0.143 |      |      | 0.248 | 0.085 | 0.027 | 0.011 | 0.189 | 0.116 | 0.023 | 0.011 |      |      | 0.151 | 0.127 | 0.096 | 0.112 |
| [2-MG-OS/2-MT-OS] <sub>total</sub>        | 0.79  | 0.65  | 4.69 | 1.03 | 0.85  | 0.58  | 5.76  | 1.32  | 1.09  | 0.70  | 8.62  | 3.07  | 2.54 | 2.13 | 3.19  | 2.67  | 5.09  | 4.42  |
| [2-MG-OS/2-MT-OS] <sub>particle</sub>     | 0.44  | 0.36  | 2.63 | 0.58 | 0.48  | 0.33  | 3.23  | 0.74  | 0.61  | 0.39  | 4.64  | 1.71  | 1.43 | 1.2  | 1.79  | 1.5   | 2.63  | 2.38  |
| [2-MG/2-MTs] <sub>particle</sub>          | 0.25  | 0.25  | 2.57 | 1.45 | 0.24  | 0.19  | 2.41  | 2.7   | 0.18  | 0.09  | 1.16  | 1.13  | 1.29 | 1.52 | 1.19  | 2.08  | 0.66  | 0.92  |
| [IEPOX-/HMML/MAE-SOA] <sub>particle</sub> | 11.06 | 6.74  | 0.78 | 0.29 | 7.80  | 6.27  | 0.75  | 0.22  | 5.62  | 2.99  | 0.73  | 0.41  | 6.43 | 7.16 | 4.71  | 5.85  | 3.12  | 3.23  |
| [IEPOX-/HMML/MAE-SOA] <sub>total</sub>    | 2.63  | 1.93  | 0.39 | 0.15 | 1.55  | 2.15  | 0.33  | 0.11  | 0.90  | 0.81  | 0.29  | 0.17  | 1.59 | 1.80 | 0.98  | 1.67  | 0.57  | 0.63  |

**Table S2.** Matrix effect factors of 2-methylerythritol and 2-MG standards and mass concentrations ( $\mu\text{g m}^{-3}$ ) of major components in eight PM<sub>2.5</sub> filter samples.

| Date of sample | NO <sub>3</sub> <sup>-</sup> | SO <sub>4</sub> <sup>2-</sup> | NH <sub>4</sub> <sup>+</sup> | OM    | EC   | PM <sub>2.5</sub> | 2-MG             |                  | 2-methylerythritol |                  |
|----------------|------------------------------|-------------------------------|------------------------------|-------|------|-------------------|------------------|------------------|--------------------|------------------|
|                |                              |                               |                              |       |      |                   | EXP 1            | EXP 2            | EXP1               | EXP2             |
| 2019/7/31      | 0.36                         | 1.67                          | 0.33                         | 3.93  | 0.94 | 11.45             | 0.86(1.0)        | 0.91(10.0)       | 1.18(1.0)          | 1.28(10.0)       |
| 2019/1/23      | 25.15                        | 8.89                          | 9.38                         | 20.53 | 3.33 | 89.14             | 0.57(1.0)        | 0.69(10.0)       | 1.38(1.0)          | 1.26(10.0)       |
| 2015/8/9       | 0.78                         | 2.6                           | 0.71                         | 1.34  | 0.76 | 6.45              | 0.63(1.0)        | 0.76(10.0)       | 1.11(1.0)          | 1.21(10.0)       |
| 2016/1/14      | 28.75                        | 19.74                         | 19.66                        | 23.21 | 5.07 | 158.17            | 0.59(1.0)        | 0.83(10.0)       | 1.14(1.0)          | 1.35(10.0)       |
| 2021/7/21      | 1.05                         | 2.54                          | 0.44                         | 3.18  | 0.3  | 12.58             | 0.83(1.0)        | 0.83(10.0)       | 1.13(1.0)          | 1.29(10.0)       |
| 2022/1/15      | 27.13                        | 7.21                          | 8.74                         | 17.35 | 2.61 | 75.83             | 0.91(1.0)        | 0.85(10.0)       | 1.36(1.0)          | 1.29(10.0)       |
| Mean           |                              |                               |                              |       |      |                   | <b>0.73±0.15</b> | <b>0.81±0.07</b> | <b>1.20±0.10</b>   | <b>1.28±0.05</b> |

The values in parentheses are the concentrations (ppm) of the standards added to the filter sample extracts. The bold numbers are the mean matrix effect ratios.

**Table S3.** Key parameters for simulating reactive uptake of IEPOX/HMML/MAE on aqueous aerosols in the Base Case and Case 1.

| Parameters                                     | IEPOX                 |                                | HMML/MAE              |                                |
|------------------------------------------------|-----------------------|--------------------------------|-----------------------|--------------------------------|
|                                                | Base Case             | Case 1                         | Base Case             | Case 1                         |
| $H^*$ at 298 K ( $M \text{ atm}^{-1}$ )        | $3.0 \times 10^7$     | $2.7 \times 10^6$ <sup>a</sup> | $1.2 \times 10^5$     | $7.5 \times 10^6$ <sup>b</sup> |
| $k_{H_2O, H^+} (M^{-2} \cdot s^{-1})$          | $9.0 \times 10^{-4}$  |                                | $9.0 \times 10^{-4}$  |                                |
| $k_{SO_4^{2-}, H^+} (M^{-2} \cdot s^{-1})$     | $8.83 \times 10^{-3}$ |                                | $2.0 \times 10^{-4}$  |                                |
| $k_{H_2O, HSO_4^-} (M^{-2} \cdot s^{-1})$      | $1.31 \times 10^{-5}$ |                                | $1.31 \times 10^{-5}$ |                                |
| $k_{SO_4^{2-}, HSO_4^-} (M^{-2} \cdot s^{-1})$ | $2.92 \times 10^{-6}$ |                                | $2.92 \times 10^{-6}$ |                                |

<sup>a</sup>(Pye et al., 2013); <sup>b</sup>(Zhang et al., 2023)

**Table S4.** Values of the Henry's law constant and gas-phase and aqueous-phase reaction rate constants with OH radicals of 2-MTs and 2-MG used in the model (Case 1).

| Parameters <sup>a</sup>                           | 2-MTs                  | 2-MG                      |
|---------------------------------------------------|------------------------|---------------------------|
| $H^*$ at 298 K ( $M \text{ atm}^{-1}$ )           | $3.38 \times 10^{10}$  | $5.25 \times 10^8$        |
| $k_{OH, gas} (cm^3 \text{ molecule}^{-1} s^{-1})$ | $3.66 \times 10^{-11}$ | $6.87 \times 10^{-12}$    |
| $k_{OH, aq} (M^{-1} s^{-1})$                      | $1.14 \times 10^9$     | $(0.97-1.41) \times 10^9$ |

The parameters listed in the table are all referenced from the model parameters described in (Zhang et al., 2023). The  $k_{OH, aq}$  for 2-MG is pH-dependent, with  $k_{OH, aq}$  equal to  $9.7 \times 10^8 M^{-1} s^{-1}$  at a pH of 2 and  $1.41 \times 10^9 M^{-1} s^{-1}$  at a pH of 5.

**Table S5.** Simulated concentrations of OH radicals and ratios of (MVK+MACR)/isoprene during the observation period.

| Parameters  | OH ( $10^6 \text{ cm}^{-3}$ ) | (MVK+MACR)<br>/isoprene |
|-------------|-------------------------------|-------------------------|
| Summer-2015 | 3.29                          | 7.72                    |
| Summer-2019 | 2.85                          | 5.07                    |
| Winter-2015 | 0.34                          | 0.58                    |
| Winter-2019 | 0.31                          | 0.45                    |

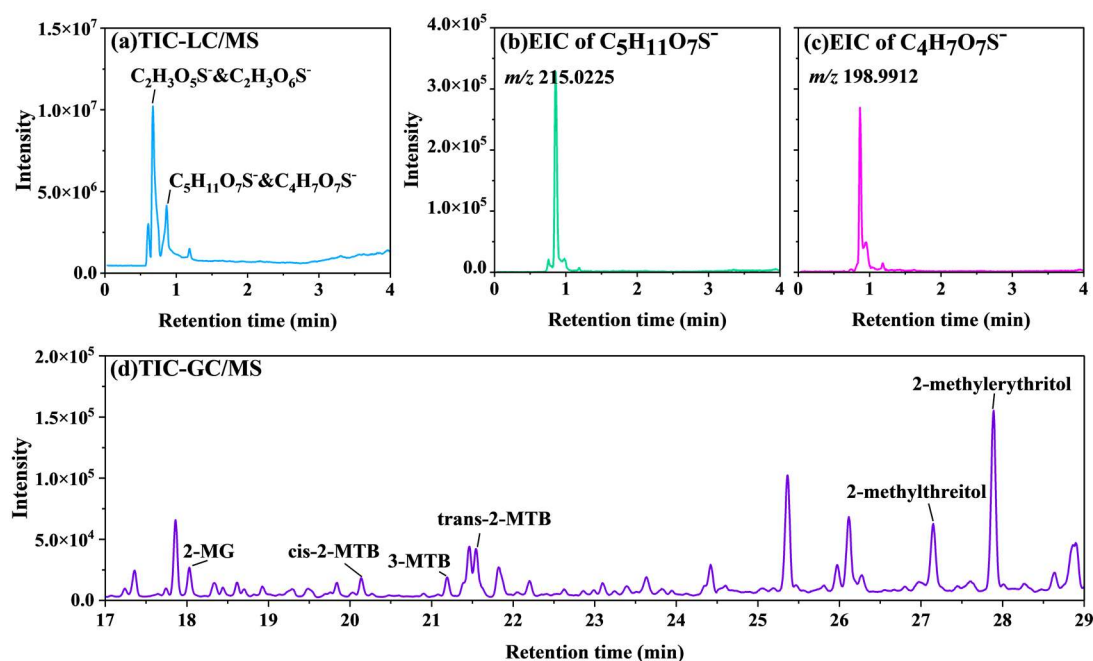

Figure S1. Example chromatograms of iSOA tracers in ambient PM<sub>2.5</sub> samples. (a) Total ion chromatogram (TIC) of iSOA OSs from the LC-MS analysis; (b) and (c) Extracted ion chromatograms of 2-methyltetrol sulfate (2-MT-OS) and 2-methylglyceric acid sulfate (2-MG-OS), respectively; (d) TIC of a trimethylsilyl-derivatized iSOA polyol tracers from the GC-MS analysis.

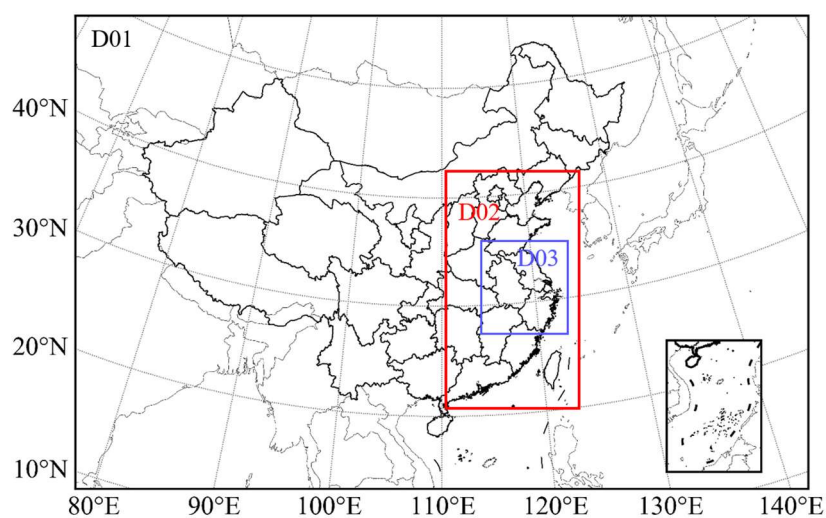

Figure S2. Three nested domains of CMAQ with horizontal resolutions of 36 km (D01), 12 km (D02), and 4 km (D03).



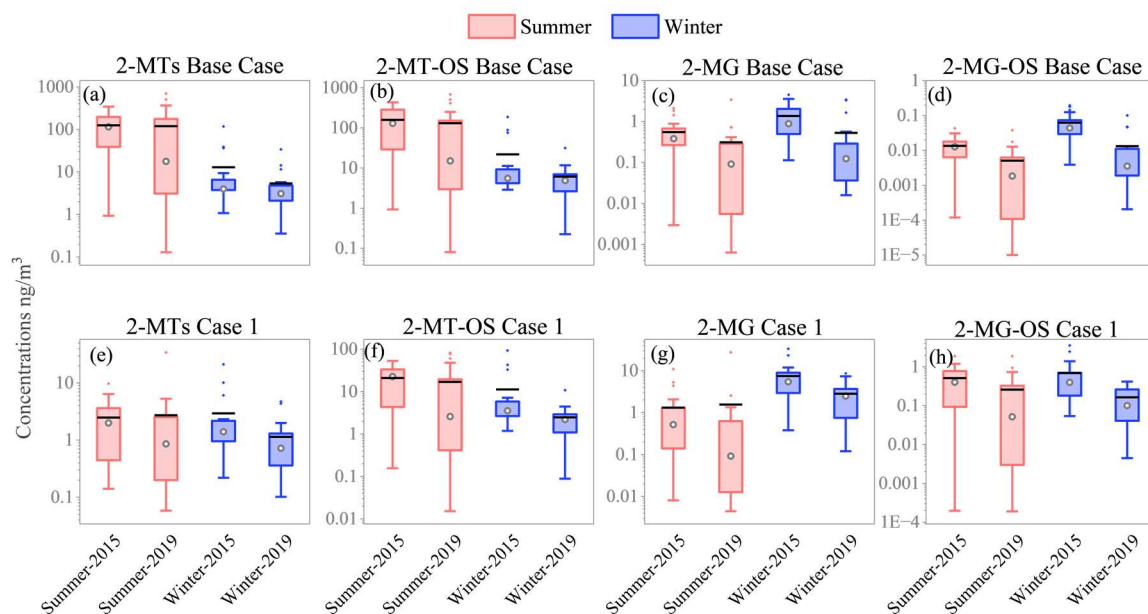

Figure S3. Simulations of iSOA tracers including 2-MTs, 2-MT-OS, 2-MG, and 2-MG-OS in Base Case (a, b, c, and d) and Case 1 (e, f, g, and h) in summer and winter of 2015 and 2019.

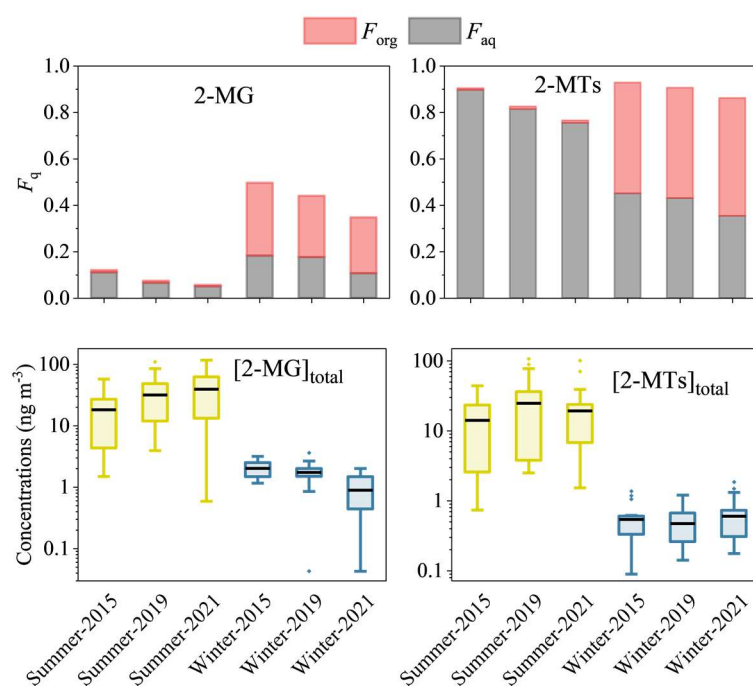

Figure S4. (a, b) Particle-phase fractions of 2-MG and 2-MTs estimated using an organic absorptive equilibrium partitioning model ( $F_{org}$ ) and Henry's Law ( $F_{aq}$ ); (c, d) Gas-plus-particle concentrations of 2-MG and 2-MTs derived using their estimated  $F_p$  values during the observation period.

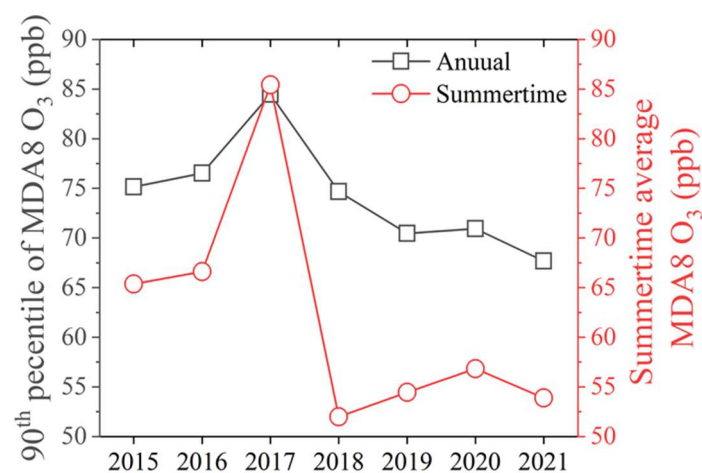

Figure S5. Annual 90th percentile of the maximum daily 8-h average (MDA8) O<sub>3</sub> concentrations in the region of Shanghai and summertime (10<sup>th</sup> June to 10<sup>th</sup> August) average MDA8 O<sub>3</sub> values at the observation site from 2015 to 2021.

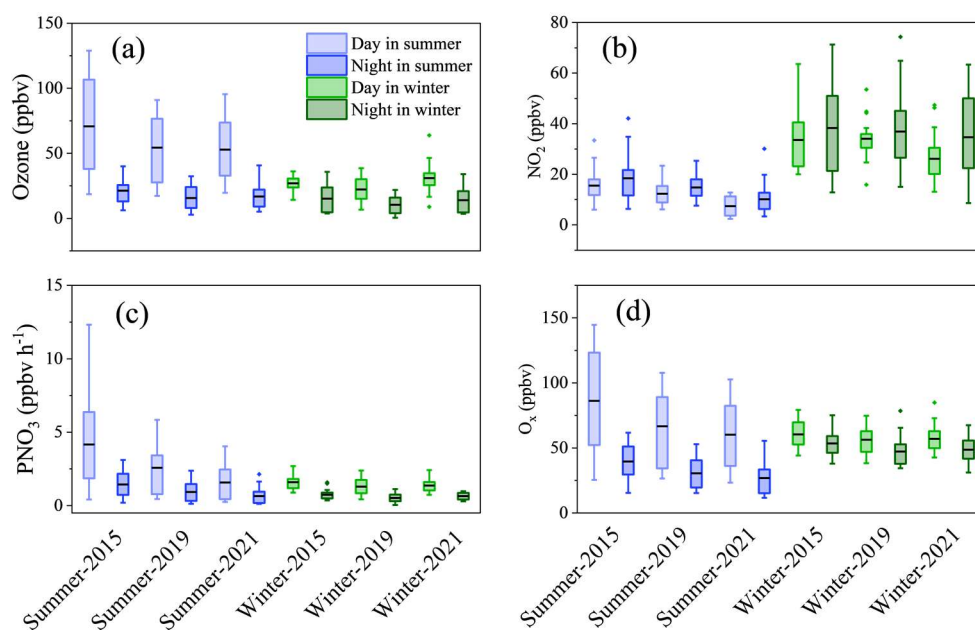

Figure S6. Box plots of concentrations of (a) ozone, (b) NO<sub>2</sub>, (c) nitrate radical production rate (PNO<sub>3</sub>), and (d) O<sub>3</sub> in Shanghai. Blue and green boxes represent summer and winter respectively.

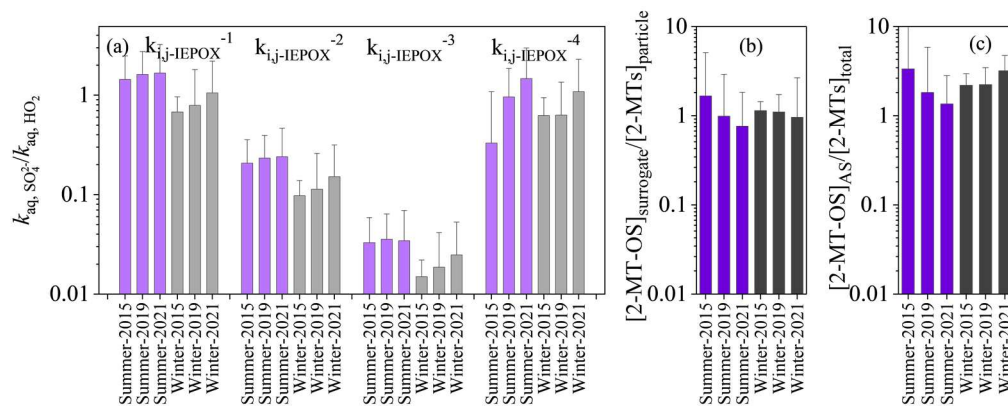

Figure S7. (a) Acid-catalyzed ring-opening reaction rates of IEPOX with sulfate vs. water ( $k_{aq, SO_4^{2-}}/k_{aq, H_2O}$ ) calculated by different reaction rate values for specific nucleophiles list in Table S2, (b) measured ratios of particulate 2-MT-OS (quantified by the surrogate standard) to 2-MTs, and (c) measured ratios of gas-plus-particle-phase concentrations of 2-MT-OS (accounting for the uncertainties in the quantification using the surrogate standard) to 2-MTs.

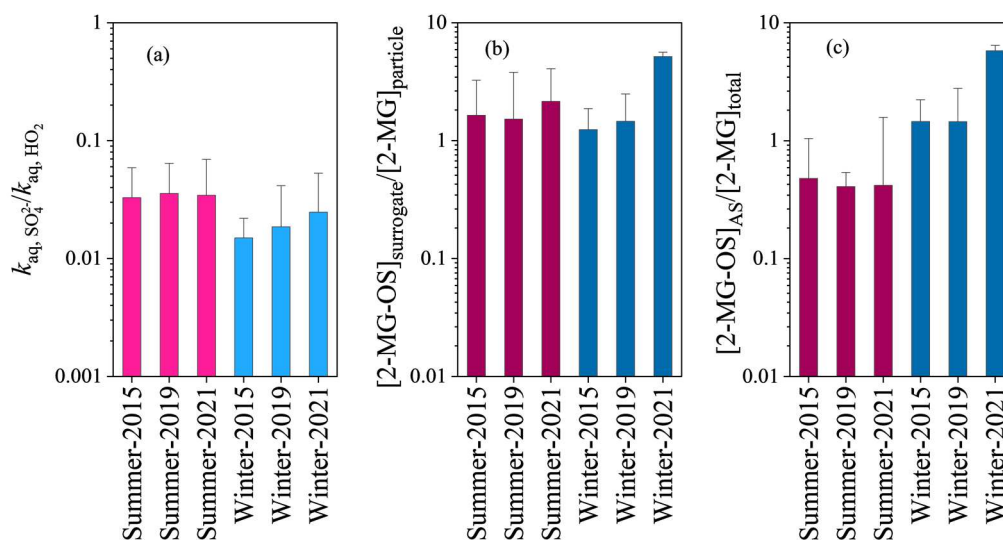

Figure S8. Comparisons between (a) estimated ratios of aqueous-phase reaction rates of HMML/MAE with sulfate to water and (b) measured ratios of particulate 2-MG-OS (quantified by the surrogate standard) to 2-MG and (c) measured ratios of gas-plus-particle-phase concentrations of 2-MG-OS (accounting for the uncertainties in the quantification using the surrogate standard) to 2-MG.

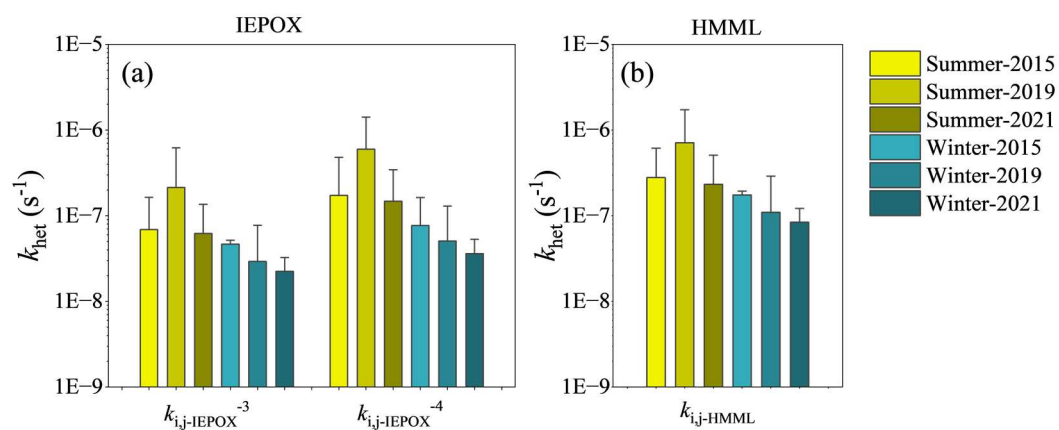

Figure S9. Values of  $k_{\text{het}}$  estimated by excluding the third-order reaction of the epoxide intermediate with bisulfate for (a) IEPOX and (b) HMML/MAE.

## References

- Brock, C. A., Wagner, N. L., Anderson, B. E., Attwood, A. R., Beyersdorf, A., Campuzano-Jost, P., Carlton, A. G., Day, D. A., Diskin, G. S., Gordon, T. D., Jimenez, J. L., Lack, D. A., Liao, J., Markovic, M. Z., Middlebrook, A. M., Ng, N. L., Perring, A. E., Richardson, M. S., Schwarz, J. P., Washenfelder, R. A., Welti, A., Xu, L., Ziemba, L. D., and Murphy, D. M.: Aerosol optical properties in the southeastern United States in summer - Part 1: Hygroscopic growth, *Atmos. Chem. Phys.*, 16, 4987-5007, 10.5194/acp-16-4987-2016, 2016.
- He, X., Wang, Q., Huang, X. H. H., Huang, D. D., Zhou, M., Qiao, L., Zhu, S., Ma, Y.-g., Wang, H.-l., Li, L., Huang, C., Xu, W., Worsnop, D. R., Goldstein, A. H., and Yu, J. Z.: Hourly measurements of organic molecular markers in urban Shanghai, China: Observation of enhanced formation of secondary organic aerosol during particulate matter episodic periods, *Atmos. Environ.*, 240, 10.1016/j.atmosenv.2020.117807, 2020.
- Huang, X.-F., Xue, L., Tian, X.-D., Shao, W.-W., Sun, T.-L., Gong, Z.-H., Ju, W.-W., Jiang, B., Hu, M., and He, L.-Y.: Highly time-resolved carbonaceous aerosol characterization in Yangtze River Delta of China: Composition, mixing state and secondary formation, *Atmos. Environ.*, 64, 200-207, 10.1016/j.atmosenv.2012.09.059, 2013.
- Liu, Y., Zhu, W., Wang, Y., Li, T., Tao, S., Qiao, L., Chen, J., Su, M., Shen, Q., and Lou, S.: Characterization of atmospheric submicron particles at an urban site in Shanghai in autumn using a high-resolution aerosol mass spectrometer, *Acta Scientiae Circumstantiae*, 38, 2746-2756, 2018.
- Nguyen, T. B., Bates, K. H., Crounse, J. D., Schwantes, R. H., Zhang, X., Kjaergaard, H. G., Surratt, J. D., Lin, P., Laskin, A., Seinfeld, J. H., and Wennberg, P. O.: Mechanism of the hydroxyl radical oxidation of methacryloyl peroxyxynitrate (MPAN) and its pathway toward secondary organic aerosol formation in the atmosphere, *Phys. Chem. Chem. Phys.*, 17, 17914-17926, 10.1039/c5cp02001h, 2015.
- O'Meara, S., Booth, A. M., Barley, M. H., Topping, D., and McFiggans, G.: An assessment of vapour pressure estimation methods, *Phys. Chem. Chem. Phys.*, 16, 19453-19469, 10.1039/c4cp00857j, 2014.
- Pankow and James, F.: An absorption model of gas/particle partitioning of organic compounds in the atmosphere, *Atmos. Environ.*, 28, 185-188, 1994.
- Petters, M. D. and Kreidenweis, S. M.: A single parameter representation of hygroscopic growth and cloud condensation nucleus activity, *Atmos. Chem. Phys.*, 7, 1961-1971, 10.5194/acp-7-1961-2007, 2007.
- Pye, H. O. T., Pinder, R. W., Piletic, I. R., Xie, Y., Capps, S. L., Lin, Y.-H., Surratt, J. D., Zhang, Z., Gold, A., Luecken, D. J., Hutzell, W. T., Jaoui, M., Offenberg, J. H., Kleindienst, T. E., Lewandowski, M., and Edney, E. O.: Epoxide Pathways Improve Model Predictions of Isoprene Markers and Reveal Key Role of Acidity in Aerosol Formation, *Environ Sci Technol*, 47, 11056-11064, 10.1021/es402106h, 2013.
- Pye, H. O. T., Murphy, B. N., Xu, L., Ng, N. L., Carlton, A. G., Guo, H., Weber, R., Vasilakos, P., Appel, K. W., Budisulistiorini, S. H., Surratt, J. D., Nenes, A., Hu, W., Jimenez, J. L., Isaacman-VanWertz, G., Misztal, P. K., and Goldstein, A. H.: On the implications of aerosol liquid water and phase separation for organic aerosol mass, *Atmos. Chem. Phys.*, 17, 343-369, 10.5194/acp-17-343-2017, 2017.
- Rasool, Q. Z., Shrivastava, M., Octaviani, M., Zhao, B., Gaudet, B., and Liu, Y.: Modeling Volatility-Based Aerosol Phase State Predictions in the Amazon Rainforest, *ACS Earth Space Chem*, 5, 2910-2924, 10.1021/acsearthspacechem.1c00255, 2021.
- Wang, Y., Zhao, Y., Wang, Y., Yu, J.-Z., Shao, J., Liu, P., Zhu, W., Cheng, Z., Li, Z., Yan, N., and Xiao, H.: Organosulfates in atmospheric aerosols in Shanghai, China: seasonal and

- interannual variability, origin, and formation mechanisms, *Atmos. Chem. Phys.*, 21, 2959-2980, 10.5194/acp-21-2959-2021, 2021.
- Wania, F., Lei, Y. D., Wang, C., Abbatt, J. P. D., and Goss, K. U.: Using the chemical equilibrium partitioning space to explore factors influencing the phase distribution of compounds involved in secondary organic aerosol formation, *Atmos. Chem. Phys.*, 15, 3395-3412, 10.5194/acp-15-3395-2015, 2015.
- Yang, T., Xu, Y., Ye, Q., Ma, Y. J., Wang, Y. C., Yu, J. Z., Duan, Y. S., Li, C. X., Xiao, H. W., Li, Z. Y., Zhao, Y., and Xiao, H. Y.: Spatial and diurnal variations of aerosol organosulfates in summertime Shanghai, China: potential influence of photochemical processes and anthropogenic sulfate pollution, *Atmos. Chem. Phys.*, 23, 13433-13450, 10.5194/acp-23-13433-2023, 2023.
- Yee, L. D., Isaacman-Vanwertz, G., Wernis, R. A., Kreisberg, N. M., and Goldstein, A. H.: Natural and anthropogenically-influenced isoprene oxidation in the Southeastern U.S.A. and central Amazon, *Environ Sci Technol*, 54, 2020.
- Zhang, J., Liu, J., Ding, X., He, X., Zhang, T., Zheng, M., Choi, M., Isaacman-VanWertz, G., Yee, L., Zhang, H., Misztal, P., Goldstein, A. H., Guenther, A. B., Budisulistiorini, S. H., Surratt, J. D., Stone, E. A., Shrivastava, M., Wu, D., Yu, J. Z., and Ying, Q.: New formation and fate of Isoprene SOA markers revealed by field data-constrained modeling, *npj Clim. Atmos. Sci.*, 6, 69, 10.1038/s41612-023-00394-3, 2023.
